# Supplementary material for: Construction of a self-supporting bifunctional Sn–SnSx electrocatalyst via one-step electrodeposition for formate production from coupled CO2 reduction and glucose oxidation
Source: Royal Society of Chemistry journal article supplement (doi:10.1039/d4gc02203c), 2024-01-01
Supplement: d4gc02203c1.pdf [file d4gc02203c1.pdf]

## Supplemental data

# Construction of a self-supporting bifunctional Sn-SnS<sub>x</sub> electrocatalyst via one-step electrodeposition for formate production from coupled CO<sub>2</sub> reduction and glucose oxidation

Chongyan Chen<sup>1,a</sup>, Shuguang Shen<sup>1,a,\*</sup>, Jie Wang<sup>a</sup>, Yongmei Liu<sup>a</sup>, Xingting Guo<sup>a</sup>, Lili  
Zhang<sup>a</sup>, Jing Li<sup>a</sup>

<sup>1</sup>The two authors contributed equally to this work and should be considered co-first  
authors.

<sup>a</sup>College of Chemical Engineering and Technology, Taiyuan University of  
Technology, Taiyuan, 030024, China

**\*Corresponding Author:** Mr. Shuguang Shen

**Corresponding author Address:** College of Chemical Engineering and Technology,  
Taiyuan University of Technology, Taiyuan 030024, China, Tel. (+86)13303511628.

**E-mail Address:** sgshen@sina.com

## Characterizations

The morphologies of the catalyst were analyzed by the scanning electron microscopy (SEM, ZEISS Gemini 300). The X-ray diffraction (XRD) patterns were recorded on a Smartlab SE X-ray diffractometer using Cu -K $\alpha$  radiation ( $\lambda = 0.15405$  nm). The X-ray photoelectron spectroscopy (XPS) was carried out on a Thermo Scientific K-Alpha. An Al-K $\alpha$  X-ray source was used with power of 72 W (6 mA and 12 kV), and the 400  $\mu$ m X-ray spot was used to acquire XPS spectra. The C1s peak (284.8 eV) was used as the standard for charge calibration. The peak resolution and fitting were processed by Avantage software. The Schofield coefficient is 37.257 for the Sn element, 1.881 for the S element, and 26.513 for the Cu element. The  $^1\text{H}$  and  $^{13}\text{C}$  NMR spectra were collected on a Bruker 400 MHz spectrometer. The NMR samples were prepared by mixing the electrolyte with D $_2$ O. The presaturation method was used to suppress the water peak. Inductively coupled plasma optical emission spectrometry (ICP-OES) measurements were conducted on an Agilent 5110 spectrometer. Transmission electron microscopy (TEM, FEI Talos F200S) was applied to study the microstructure of the sample. Electrochemical measurements were performed on a CHI660E electrochemical workstation (Shanghai, China).

## Electrochemical Measurements

The CO $_2$ RR and GOR performance of Sn-SnS $_x$  electrode were performed in a commercial H-type electrolyzer separating by a cation exchange membrane (Nafion 117). The Ag/AgCl electrode, platinum plate (1  $\times$  1 cm $^2$ ) and Sn-SnS $_x$  (1  $\times$  1 cm $^2$ ) act as the reference electrode, counter electrode, and work electrode, respectively. For CO $_2$ RR, 50 mL 0.1 M KHCO $_3$  aqueous solution was used as catholyte. For GOR, 50 mL 0.1 M KOH and 0.1 M glucose aqueous solution were used as anolyte. Before electrolysis, the cathode electrolyte was bubbled with CO $_2$  at least 30 min with a flow rate of 30 mL min $^{-1}$ .

All potentials were measured with the Ag/AgCl reference electrode and converted to the reversible hydrogen electrode (RHE) according to the Eq. (1):

$$E(\text{vs. RHE}) = E(\text{vs. Ag/AgCl}) + 0.197 \text{ V} + 0.059 \text{ V} \times \text{pH} \dots \dots \dots (1)$$

**LSV:** Cyclic voltammetry (CV) was repeatedly carried out before other tests until stable CV curves were observed. The linear sweep voltammetry (LSV) test at cathode was performed in the CO<sub>2</sub> or N<sub>2</sub> saturated 0.1 M KHCO<sub>3</sub> aqueous solution at a scan rate of 5 mV s<sup>-1</sup>. The LSV test at anode was performed in the aqueous solution with and without 0.1 M glucose at a scan rate of 5 mV s<sup>-1</sup>.

**Tafel plot:** The current-potential data were obtained by LSV at a scan rate of 0.1 mV/s. The Tafel slope was obtained from the LSV curve using a linear fit applied to points in the Tafel region.

**EIS:** The electrochemical impedance spectroscopy (EIS) was measured over a frequency range of 0.01 Hz to 100 kHz, applying a sinusoidal voltage with an amplitude of 5 mV at open-circuit potential (OCP).

**C<sub>dl</sub>:** A series of CV experiments were conducted on the voltage range of 0 - -0.1 V vs. RHE at different scan rates of 20, 40, 60, 80, 100, and 120 mV/s. Linear fitting was performed with scanning speed (mV/s) as the x-axis and Δ*j* (mA/cm<sup>2</sup>) as the y-axis, and the slope of the curve was the double-layer capacitance C<sub>dl</sub> (mF/cm<sup>2</sup>).

**Product Quantification**

The HPLC was also conducted on EasySep-3030 with a UV-Vis detector to determine and analyze the **formate** in the solutions. 5 mM H<sub>3</sub>PO<sub>4</sub> solution was used as the mobile phase with a constant flow rate of 1 mL/min.

The Faradaic efficiencies (FEs) for the liquid product in GOR and CO<sub>2</sub>RR were calculated using Eq. (2):

$$\text{FE} (\%) = n m F/Q \times 100\% \dots \dots \dots (2)$$

*n* is the number of exchanged electrons to form 1 mol formate, 2 for CO<sub>2</sub>RR and 2 for GOR. *m* is the amount of formate calculated from high performance liquid chromatography (HPLC) (mol). *F* is the Faradaic constant (96485 C/mol); *Q* is the total charge flowing through the electrode surface (C).

Analysis of **CO** and **H<sub>2</sub>** was conducted on gas chromatograph HXSP GC-950 equipped with Flame Ionization Detector (FID) and thermal conductivity detector (TCD) using Ar as carrier gas. FE for the gas product in CO<sub>2</sub>RR was calculated according to Eq. (3):

$$FE (\%) = n P V v_i F / R T Q \times 100\% \dots\dots\dots(3)$$

*n* is the number of exchanged electrons to CO or H<sub>2</sub>; *P* is atmospheric pressure (101325 Pa); *V* is the volume flow rate of the CO<sub>2</sub> supplied to the H-cell throughout electrolysis; *v<sub>i</sub>* is the volume fraction of CO or H<sub>2</sub> in the gas sample, which is determined by gas chromatography (GC); *R* is the gas constant (8.314 J·mol<sup>-1</sup>·K<sup>-1</sup>); *T* is the temperature (298.15 K).

**Glucose quantification**

Quantitative analysis of **glucose** was performed using HPLC (Viscotek VE3580) with assembled amino column and RI detector. Xylose served as an internal standard, using a mixture of acetonitrile and water (7:3) as the mobile phase, with a flow rate of 1 ml/min. The glucose conversion was calculated by the following equations:

$$\text{Conversion (\%)} = \text{Moles of carbon in feedstock consumed} / \text{Moles of carbon in feedstock input} \times 100\%$$

**Calculation of production rate (PR), energy consumption (W<sub>E</sub>) and the energy efficiency of the CO<sub>2</sub>RR//GOR cell (EE<sub>cell</sub>):**

**PR:** The PR (μmol h<sup>-1</sup> cm<sup>-2</sup>) of formate produced by CO<sub>2</sub>RR or GOR was calculated as follows (4):

$$PR = \frac{c \times V}{t \times S} \times 100\% \quad (4)$$

where *c* is the molar concentration of formate in the electrolyte (μmol L<sup>-1</sup>); *V* is the volume of the electrolyte (L); *t* is the reaction time (h); *S* is the geometric area of the working electrode (cm<sup>2</sup>).

**W<sub>E</sub>:** The energy consumption *W<sub>E</sub>* (Wh mmol<sup>-1</sup><sub>formate</sub>) of CO<sub>2</sub>RR//GOR and

CO<sub>2</sub>RR//OER systems can be calculated using formula (5):

$$\text{Energy consumption} = W/m = U \times Q/m \quad (5)$$

where  $U$  is the applied cell voltage (1.8 V),  $Q$  is the consumed electricity after 1 h of reaction at 1.8 V in the CO<sub>2</sub>RR//GOR and CO<sub>2</sub>RR//OER system (C),  $m$  represents the amount of formate (1461.24 mmol for CO<sub>2</sub>RR//GOR and 229.68 mmol for CO<sub>2</sub>RR//OER after reaction for 1 h at 1.8 V).

The “**energy savings**” was determined based on the following equation (6):

$$\text{Energy saving} = (WE1 - WE2)/WE1 \times 100\% \quad (6)$$

in which  $W_{E1}$  and  $W_{E2}$  represent the electric energy consumption in producing per mol of formate in the CO<sub>2</sub>RR//OER (0.12Wh mmol<sup>-1</sup><sub>formate</sub>) and CO<sub>2</sub>RR//GOR (0.05Wh mmol<sup>-1</sup><sub>formate</sub>) systems, respectively.

The **energy efficiency of the CO<sub>2</sub>RR//GOR cell ( $EE_{cell}$ )** is calculated using the

equation:<sup>1</sup> 
$$EE_{cell} = \frac{|FE_{\text{formate}}^{\text{cathode}} E_{\text{CO}_2/\text{formate}} - FE_{\text{formate}}^{\text{anode}} E_{\text{glucose/formate}}|}{V_{cell}}$$
 to calculate the energy efficiency ( $EE_{cell}$ ) of the CO<sub>2</sub>RR//GOR cell. Where  $E_{\text{CO}_2/\text{formate}}$  and  $E_{\text{glucose/formate}}$  represent the reduction potentials for CO<sub>2</sub> and glucose, respectively, under non-standard conditions. The potential value can be calculated using the Nernst equation (Equation 7), and the calculation process is listed in Table S5.

$$E = E^0 - 0.059 \times \text{pH} \quad (7)$$

Among them,  $E^0$  represents the standard potential,  $E_{\text{CO}_2/\text{formate}}^0$  can be obtained from literature, and  $E_{\text{Cglucose/formate}}^0$  can be calculated based on the standard Gibbs free energy change  $\Delta G_{\text{rxn}}^0$  (Equation 8):

$$E^0 = -\Delta G_{\text{rxn}}^0/nF \quad (8)$$

where  $\Delta G_{\text{rxn}}^0$  represents the difference in standard Gibbs free energy,  $\Delta G_f^0$  can be obtained from literature.  $n$  is the number of transfer electron, and  $F$  is the Faraday constant.



## Supplementary figures and tables

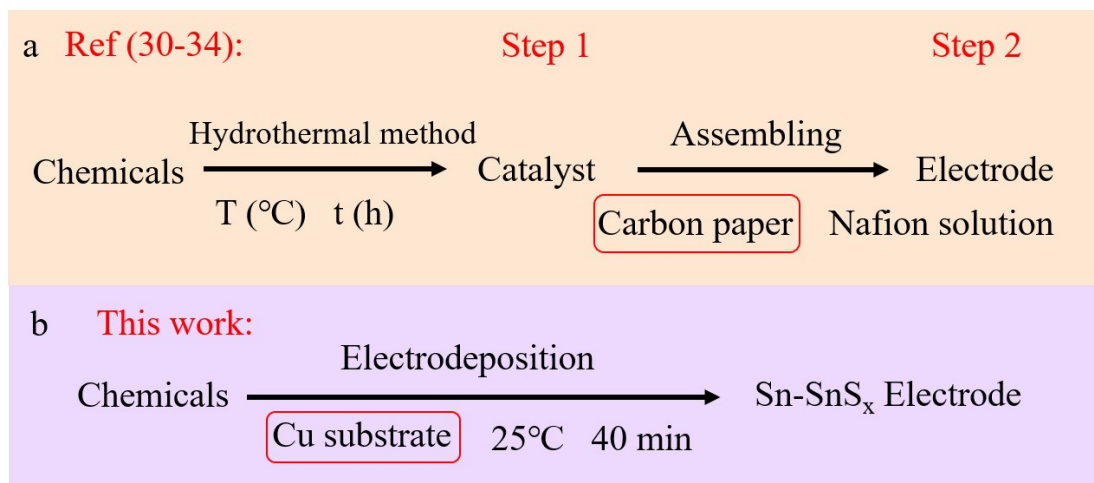

**Figure S1.** Two step preparation of tin sulfide electrodes (a), Preparation of Sn-SnS<sub>x</sub> electrode by one-step in-situ electrodeposition (b).

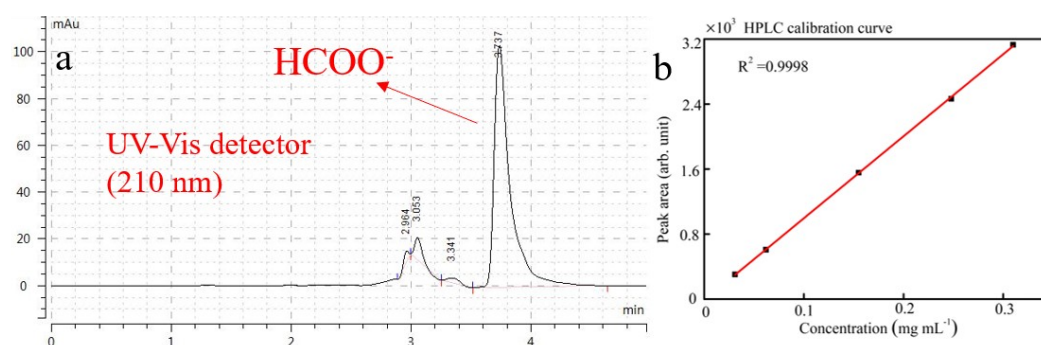

**Figure S2.** The spectra of  $\text{HCOO}^-$  product detected by HPLC (a), Calibration curve for  $\text{HCOO}^-$  (b).

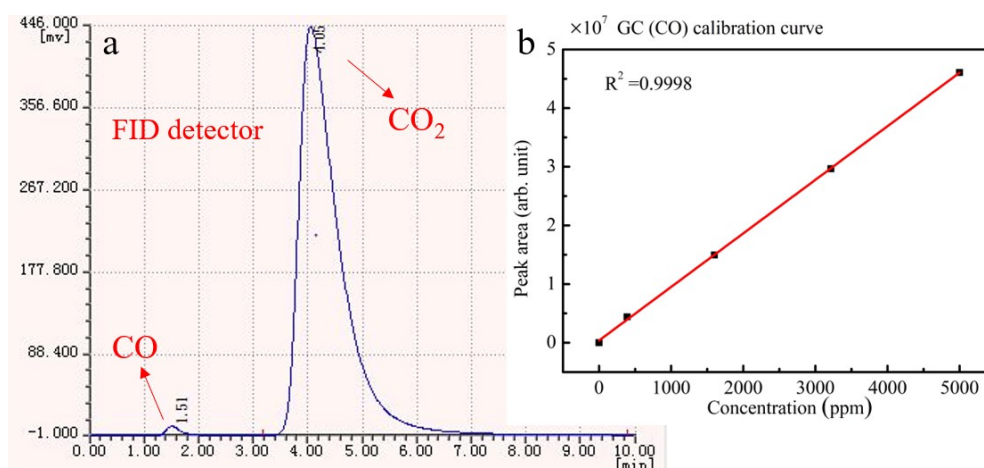

**Figure S3.** The spectra of CO product detected by GC (a), Calibration curve for CO (b).

(b).

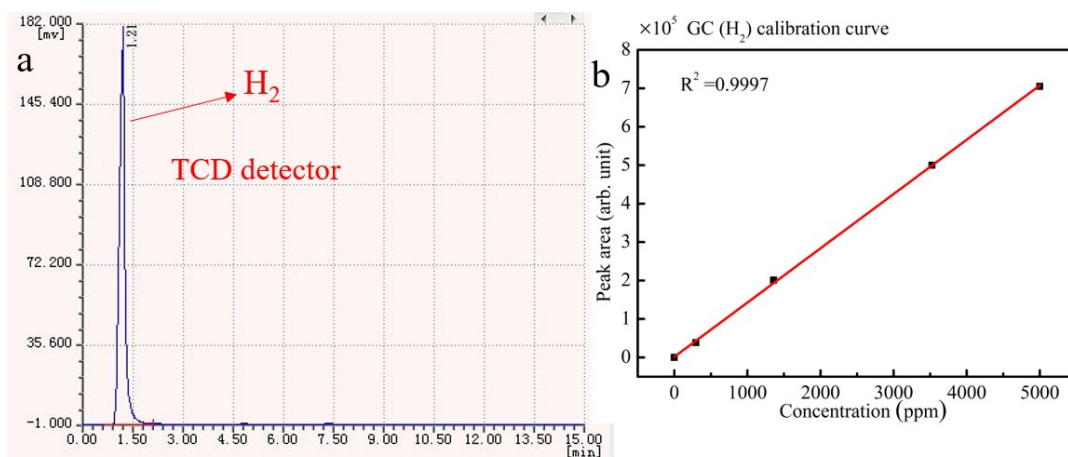

**Figure S4.** The spectra of H<sub>2</sub> product detected by GC (a), Calibration curve for H<sub>2</sub> (b).

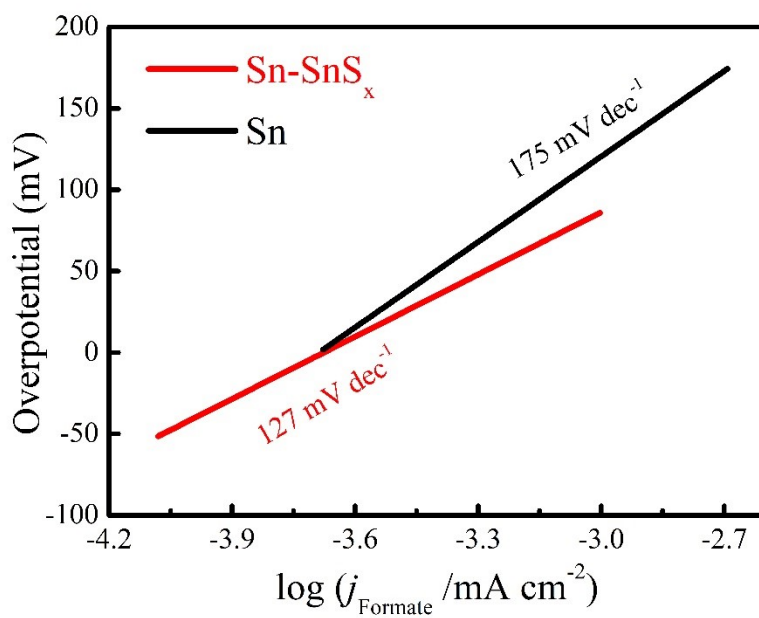

**Figure S5.** Tafel plots of Sn and Sn-SnS<sub>x</sub> electrode.



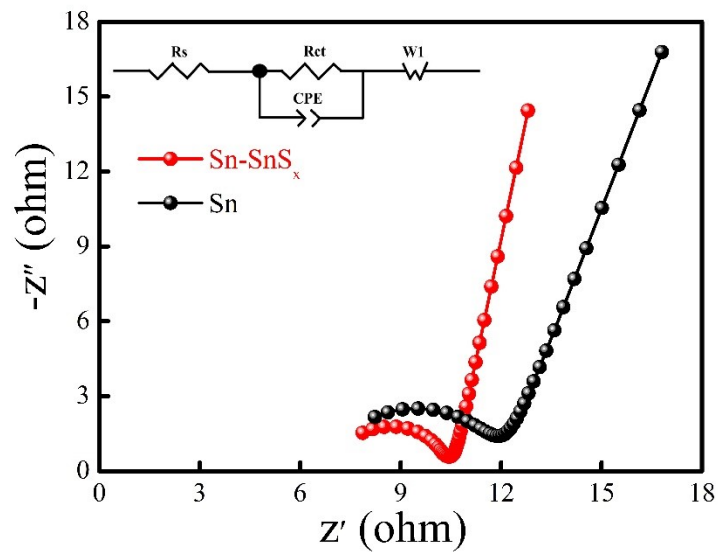

**Figure S6.** EIS results of Sn (OCP: -225.5 mV) and Sn-SnS<sub>x</sub> (OCP: -157.2 mV) electrode.

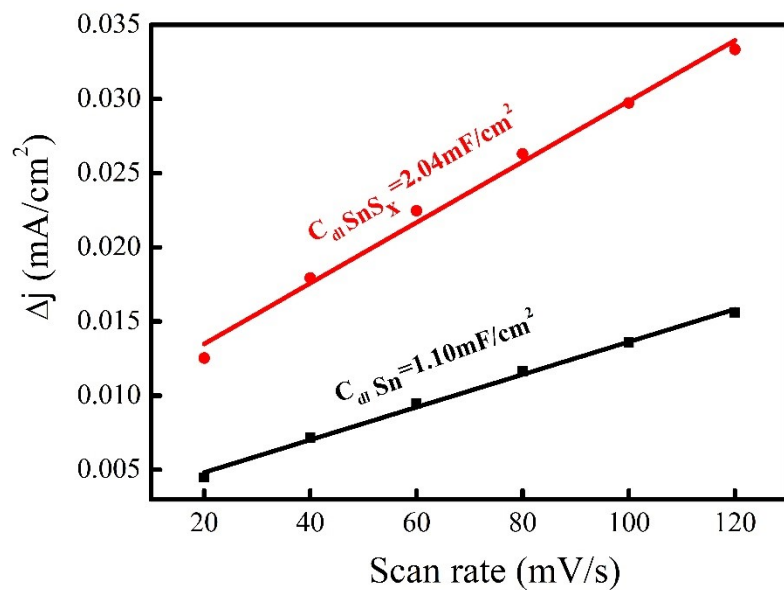

**Figure S7.** Plots of charging current density difference versus scan rate for Sn and Sn-SnS<sub>x</sub> with a fit slope of C<sub>dl</sub>.

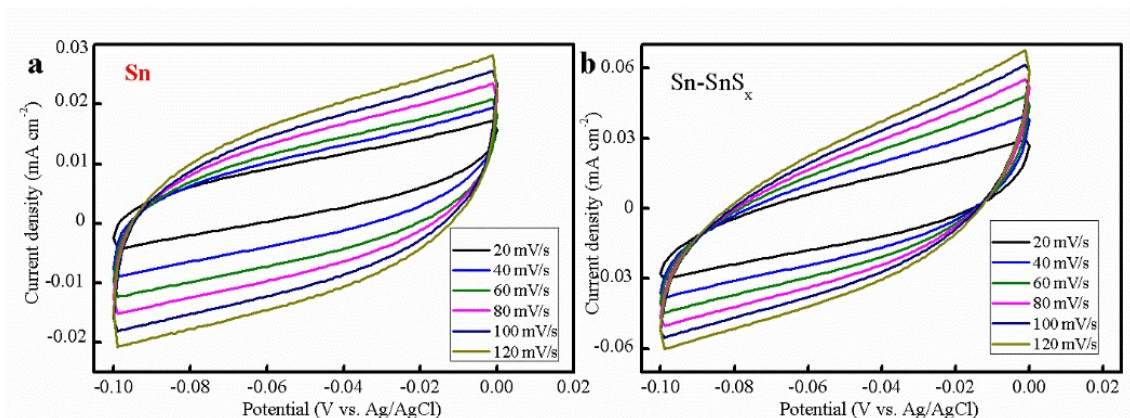

**Figure S8.** Cyclic voltammetry (CV) curves of Sn (a) and Sn-SnS<sub>x</sub> (b) at different scanning speeds.

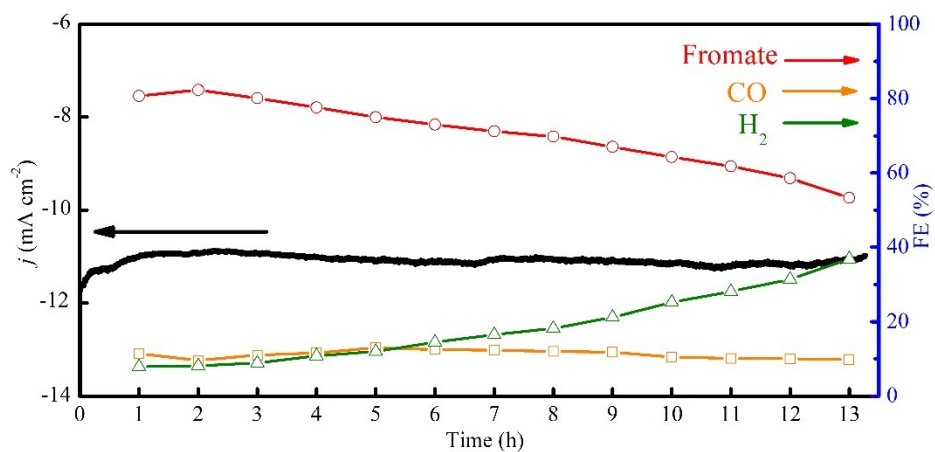

**Figure S9.** Electrocatalytic durability of Sn during the long-term CO<sub>2</sub> electrolysis at the constant potential of -1.2 V vs. RHE.

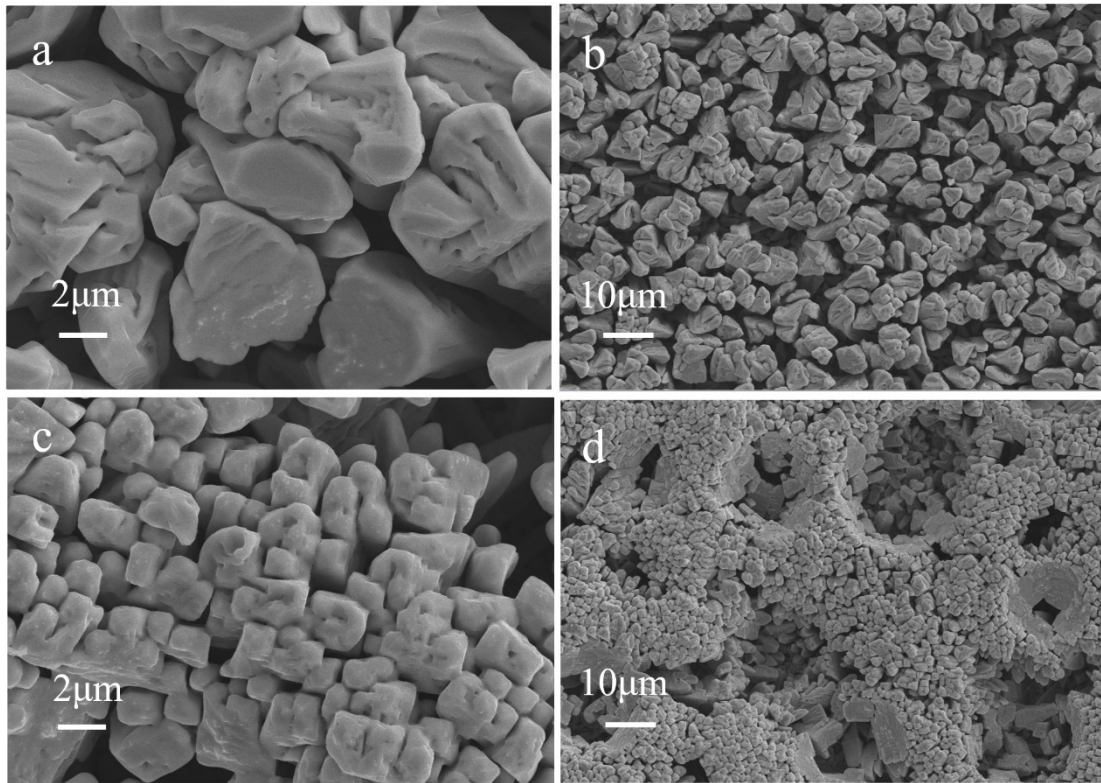

**Figure S10.** SEM images of Sn electrode before (a,b) and three hours after (c,d) the CO<sub>2</sub>RR.

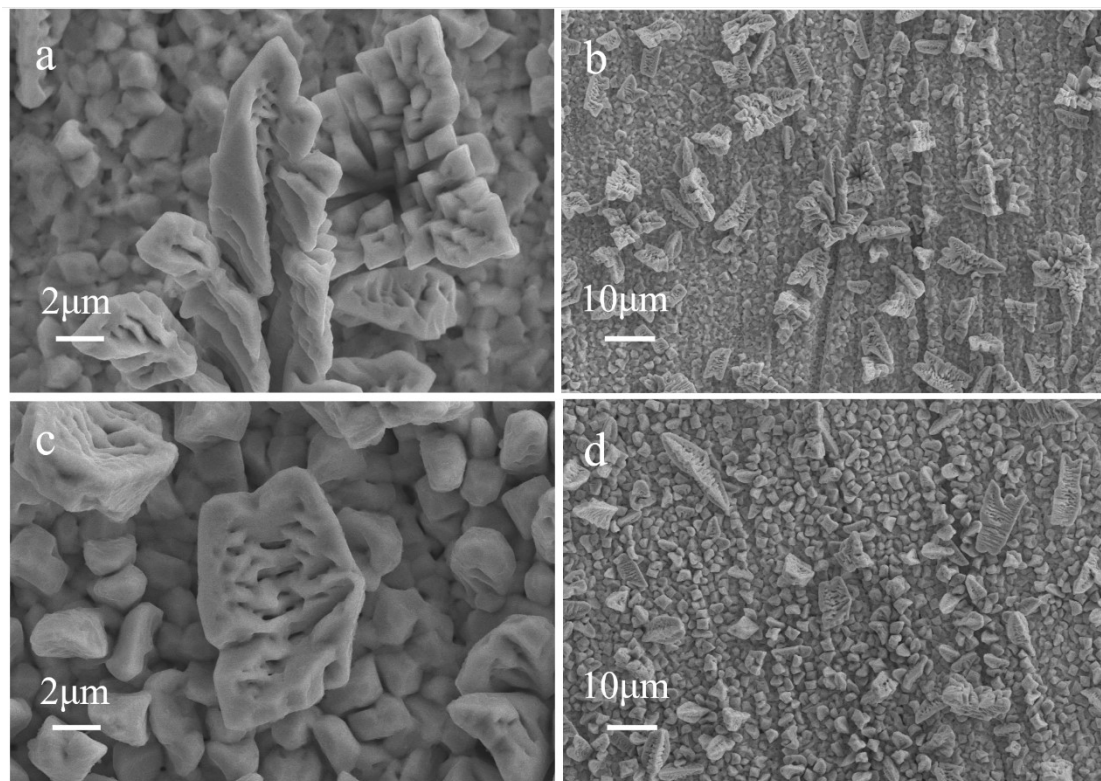

**Figure S11.** SEM images of Sn-SnS<sub>x</sub> electrode before (a, b) and twenty hours after (c, d) the CO<sub>2</sub>RR.

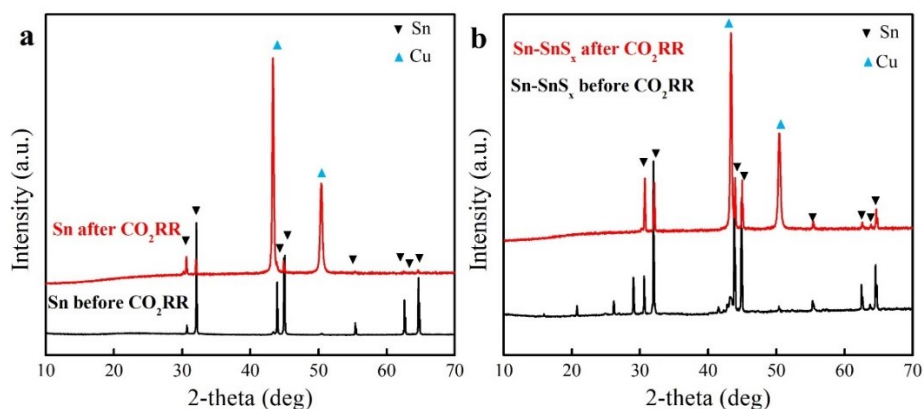

**Figure S12.** XRD patterns of Sn electrode (a) before and 13 hours after the CO<sub>2</sub>RR, Sn-SnS<sub>x</sub> (b) electrode before and 36 hours after the CO<sub>2</sub>RR.

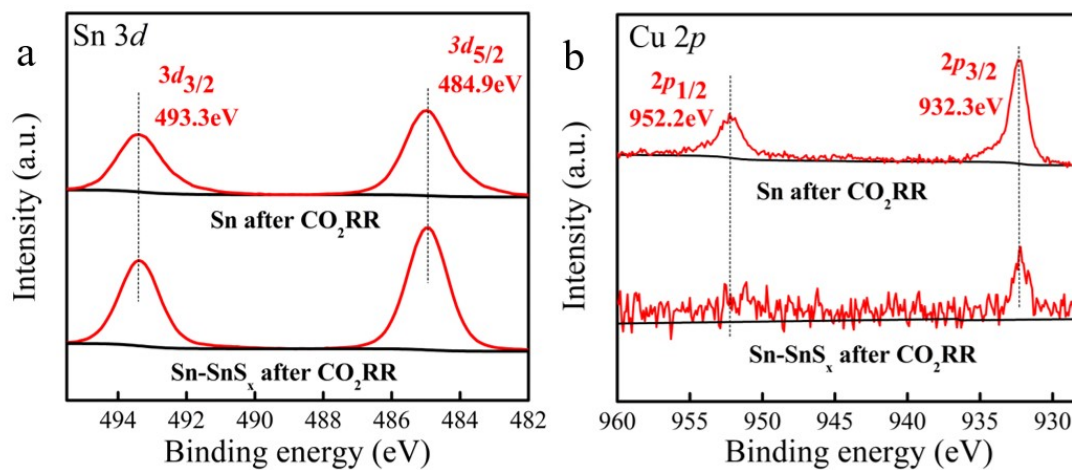

**Figure S13.** XPS survey spectra of Sn 3d (a), Cu 2p (b) for the Sn and Sn-SnS<sub>x</sub> electrodes after the CO<sub>2</sub>RR.

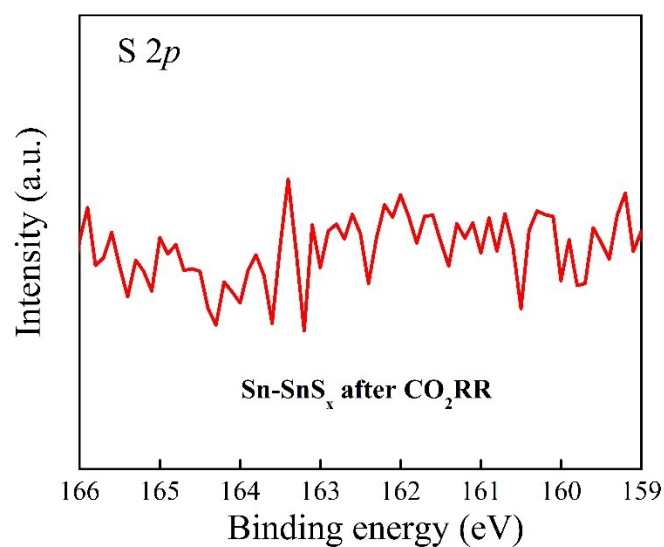

**Figure S14.** XPS survey spectra of S 2p for the Sn-SnS<sub>x</sub> electrode after the CO<sub>2</sub>RR.

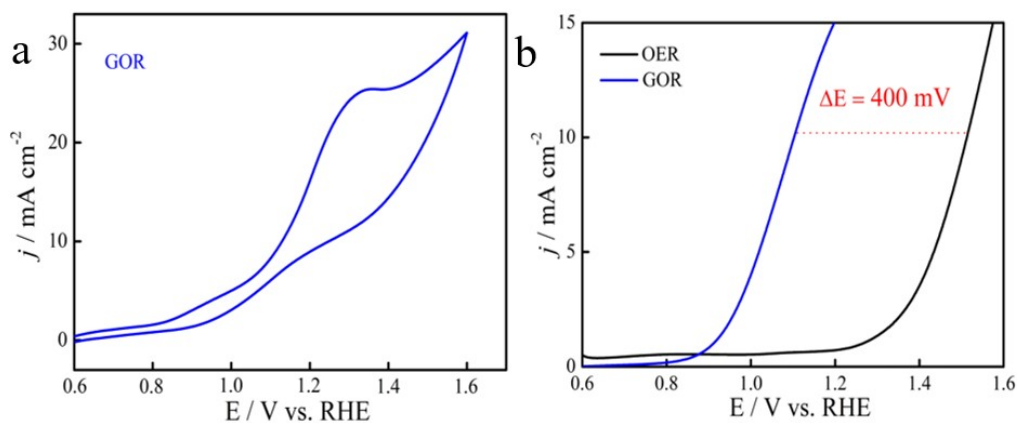

**Figure S15.** The CV curve (scan rate:  $5 \text{ mV s}^{-1}$ ) of Sn-SnS<sub>x</sub> electrode in 0.1 M KOH and 0.1 M glucose aqueous solution (a), LSV curves (scan rate:  $5 \text{ mV s}^{-1}$ ) of Sn-SnS<sub>x</sub> electrode with and without the existence of C<sub>6</sub>H<sub>12</sub>O<sub>6</sub> in the anode cell (b).

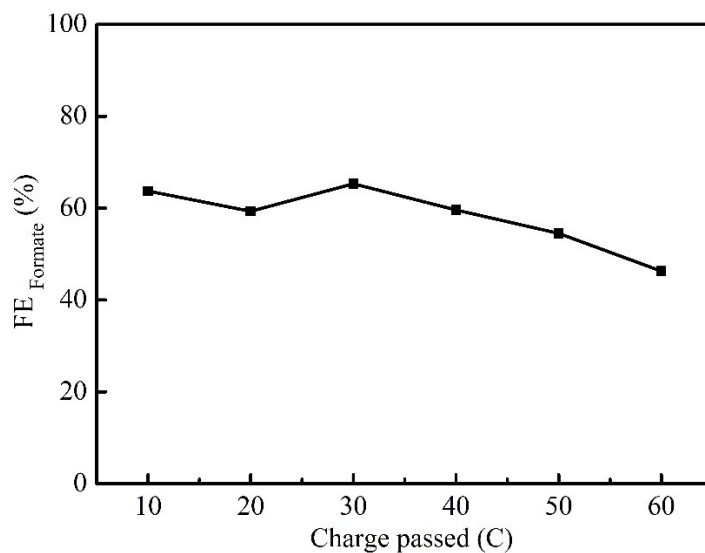

**Figure S16.** FEs of glucose oxidation to formate on Sn electrode with different charges passed.

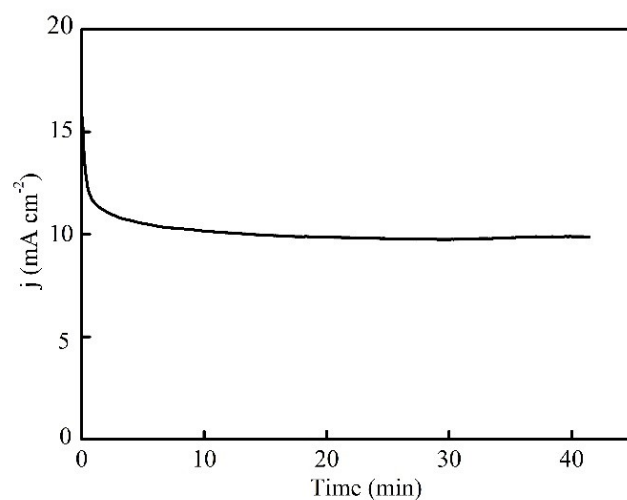

**Figure S17.** Stability of Sn electrode for oxidation of glucose to formate at 1.17 V vs. RHE.

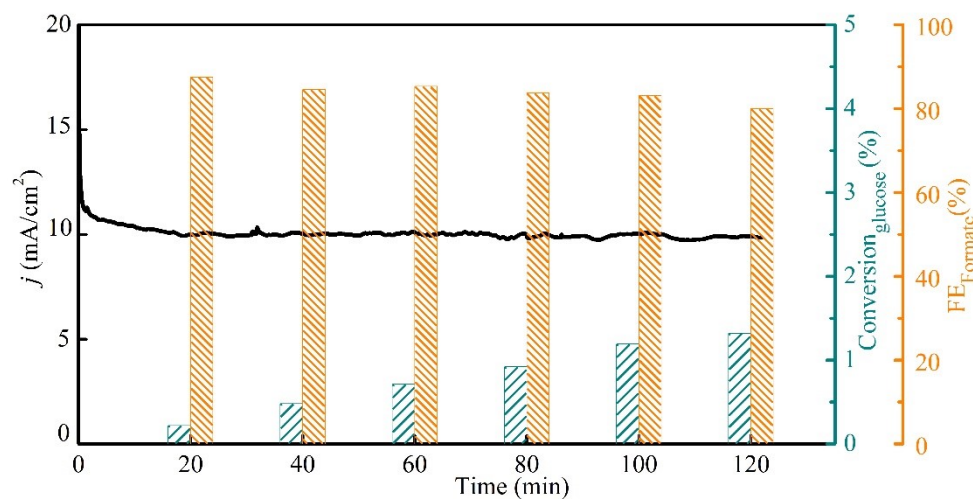

**Figure S18.** Stability of Sn-SnS<sub>x</sub> electrode for oxidation of glucose to formate at 1.1 V vs. RHE.

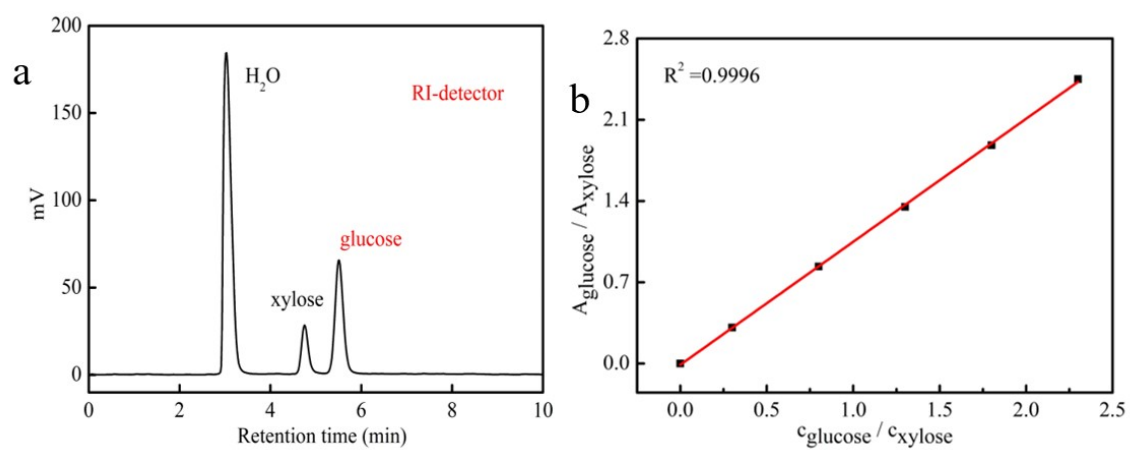

**Figure S19.** The spectra of glucose detected by HPLC (a), Calibration curve for glucose (b).

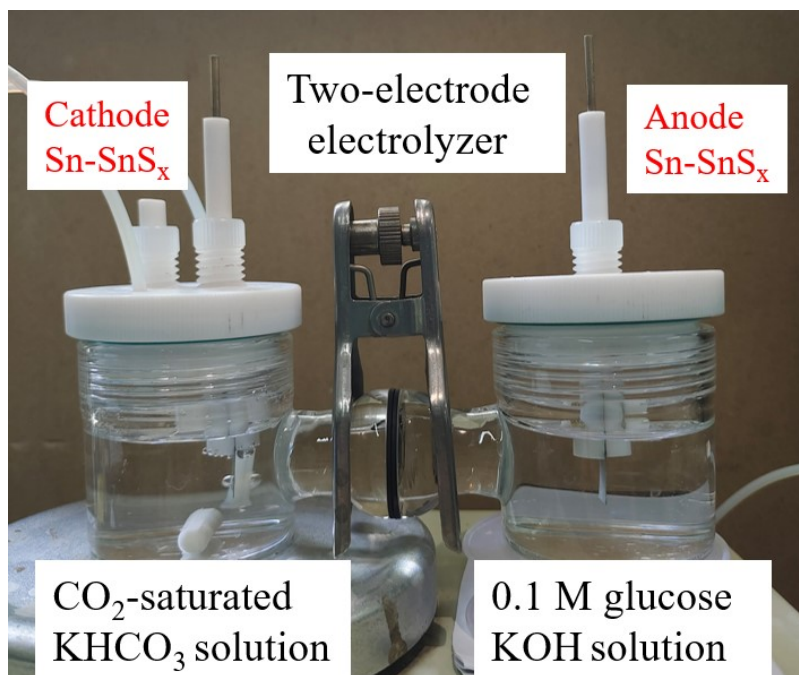

**Figure S20.** Photograph of the two-electrode cell used for investigating the coupled cathodic CO<sub>2</sub> reduction reaction and anodic glucose oxidation reaction, utilizing the Sn-SnS<sub>x</sub> electrode in both cells. The two-electrode electrolyzer consisted of 0.1 M KHCO<sub>3</sub> in the cathode cell and a solution of 0.1 M KOH mixed with 0.1 M glucose in the anode cell, which was separated by a Nafion 117 membrane.

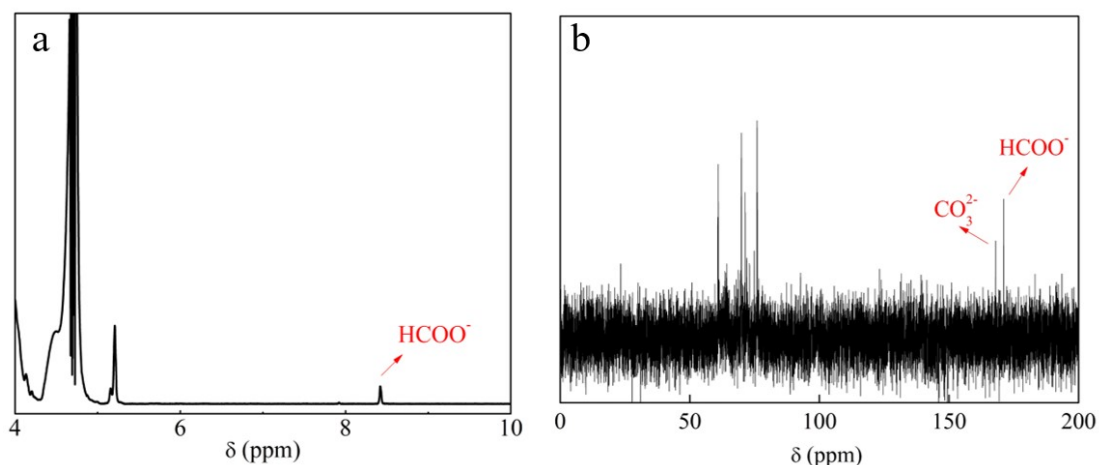

**Figure S21.** <sup>1</sup>H NMR spectrum (a) and <sup>13</sup>C NMR spectrum of the anode electrolyte of the CO<sub>2</sub>RR//GOR system after half an hour of reaction at 2.2V voltage.

**Table S1.** The elemental contents of Sn, S calculated from the XPS and TEM-EDX

|         | Sn (At. %) | S (At. %) |
|---------|------------|-----------|
| XPS     | 65.3       | 34.7      |
| TEM-EDX | 75.6       | 24.4      |

**Table S2.** Content of elements in Sn-SnS<sub>x</sub> catalyst determined by inductively coupled plasma optical emission spectrometer (ICP-OES).

| Catalyst            | Sn (wt %) | S (wt %) |
|---------------------|-----------|----------|
| Sn-SnS <sub>x</sub> | 96.9      | 3.1      |

**Table S3.** Performance comparison of CO<sub>2</sub> reduction to formate with tin-based catalysts

| Electrocatalyst                         | Stability (h) | FE <sub>Formate</sub> (%) | $j_{\text{Formate}}$ (mA cm <sup>-2</sup> ) | Reference |
|-----------------------------------------|---------------|---------------------------|---------------------------------------------|-----------|
| Sn quantum sheet                        | 50            | 60                        | 7.2                                         | 2         |
| Sn-pNWs                                 | 15            | 86.2                      | 6.2                                         | 3         |
| Cu <sub>6,26</sub> Sn <sub>5</sub>      | 10            | 92.5                      | 8.5                                         | 4         |
| Sn <sub>95</sub> -Co <sub>5</sub> /Cu-f | 12            | 72.2                      | 22.12                                       | 5         |
| Nano-SnO <sub>2</sub> graphene          | 18            | 93                        | 8.9                                         | 6         |
| SnO <sub>2</sub> -CNT                   | 10            | 76.3                      | 8                                           | 7         |
| SnO <sub>2</sub> /CA-80                 | 12            | 76                        | 16                                          | 8         |
| Sn/SnO <sub>x</sub>                     | 12            | 89.6                      | 11.2                                        | 9         |
| SnO <sub>x</sub> /AgSn                  | 25            | 80                        | 12.8                                        | 10        |
| Bi <sub>3</sub> S-SnO <sub>2</sub>      | 1.5           | 55.6                      | 9.33                                        | 11        |
| 1%Sb-SnS <sub>2</sub> nanosheet         | 8             | 90.9                      | 5.5                                         | 12        |
| SnS <sub>2</sub> /Sn/rGO                | 14            | 84.5                      | 13.9                                        | 13        |
| SnS/Sn-NSC NHs                          | 9             | 91                        | 5                                           | 14        |
| Sn-SnS <sub>x</sub>                     | 36            | 93.3                      | 18.6                                        | this work |

**Table S4.** Performance comparison of biomass oxidation to formate

| Reactant | Electrocatalyst | $\Delta E$ (mV) | FE <sub>Formate</sub> (%) | Reference |
|----------|-----------------|-----------------|---------------------------|-----------|
|----------|-----------------|-----------------|---------------------------|-----------|



|                     |                                        |     |      |           |
|---------------------|----------------------------------------|-----|------|-----------|
| raw sugarcane juice | CoNi LDH                               | 229 | 79.4 | 15        |
| glucose             | Cr-NiFe/NF                             | 34  | 79.1 | 16        |
| glucose             | NiFe/NF                                | 24  | 69.1 | 16        |
| methanol            | Co <sub>3</sub> O <sub>4-x</sub> /NF-P | 200 | 90   | 17        |
| xylose              | NiCoP                                  | 280 | 68.6 | 18        |
| glucose             | Sn-SnS <sub>x</sub>                    | 400 | 88.5 | this work |

**Table S5:** Reduction potential calculations under operating conditions of the two-electrode configuration.

| Reaction potential, $E$ (Vvs.NHE)   | Calculation                                                                                                                                                    | Reference values <sup>a</sup>                                                                                                              |
|-------------------------------------|----------------------------------------------------------------------------------------------------------------------------------------------------------------|--------------------------------------------------------------------------------------------------------------------------------------------|
| $E_{\text{CO}_2/\text{formate}}$    | $E = -0.25 - 0.059 \times 6.7 = -0.65$                                                                                                                         | $E_{\text{CO}_2/\text{formate}}^0 = -0.25\text{V vs. RHE}$ <sup>19, 20</sup>                                                               |
| $E_{\text{glucose}/\text{formate}}$ | $\Delta G_{\text{rxn}}^0 = \Delta G_f^0(\text{glucose}) - \Delta G_f^0(\text{formate})$<br>$= -557.6 \text{ kJ/mol}$<br>$E = 0.48 - 0.059 \times 12.3 = -0.24$ | $\Delta G_f^0(\text{glucose}) = -919 \text{ kJ/mol}$ <sup>21</sup><br>$\Delta G_f^0(\text{formate}) = -361.4 \text{ kJ/mol}$ <sup>21</sup> |

<sup>a</sup> Values for glucose and formate reported under standard conditions of 1 bar and 298 K.

**Table S6.** Performance comparison of coupling of anode and cathode to produce formate

| Reactant        | Anode                                 |                 | Cathode                 |          | Cell voltage (V) | Anode FE <sub>Formate</sub> (%) | Cathode FE <sub>Formate</sub> (%) | Reference |
|-----------------|---------------------------------------|-----------------|-------------------------|----------|------------------|---------------------------------|-----------------------------------|-----------|
|                 | Electrode                             | Reactant        | Electrode               | Reactant |                  |                                 |                                   |           |
| ethylene glycol | NiCo <sub>2</sub> O <sub>4</sub> /CFP | CO <sub>2</sub> | Sn&SnO <sub>2</sub> /CC |          | 1.90             | 85                              | 70                                | 22        |
| methanol        | CuONS/CF                              | CO <sub>2</sub> | mSnO <sub>2</sub> /CC   |          | 1.22             | 91.3                            | 80.5                              | 23        |
| glycerol        | CoP/NF                                | CO <sub>2</sub> | Ag/BOC                  |          | 2.2              | 82.4                            | 47.6                              | 24        |
| glycerol        | Ni <sub>x</sub> B/NF                  | CO <sub>2</sub> | BiOBr/NF                |          | /                | 45                              | 96                                | 25        |
| glucose         | Sn-SnS <sub>x</sub>                   | CO <sub>2</sub> | Sn-SnS <sub>x</sub>     |          | 1.80             | 87.4                            | 93.9                              | this work |

## References

- 1 M. A. Bajada, S. Roy, J. Warnan, K. Abdiaziz, A. Wagner, M. M. Roessler and E. Reisner, *Angew. Chem. Int. Ed.*, 2020, **59**, 15633-15641.
- 2 F. Lei, W. Liu, Y. Sun, J. Xu, K. Liu, L. Liang, T. Yao, B. Pan, S. Wei and Y. Xie, *Nat. Commun.*, 2016, **7**, 12697.
- 3 B. Kumar, V. Atla, J. P. Brian, S. Kumari, T. Q. Nguyen, M. Sunkara and J. M. Spurgeon, *Angew. Chem. Int. Ed.*, 2017, **56**, 3645-3649.
- 4 D. Li, L. Huang, Y. Tian, T. Liu, L. Zhen and Y. Feng, *Appl. Catal. B Environ. Energy*, 2021, **292**, 120119.
- 5 Q. Hu, M. Xu, S. Hu, P.-L. Tremblay and T. Zhang, *J. Electroanal. Chem.*, 2020, **877**, 114623.
- 6 S. Zhang, P. Kang and T. J. Meyer, *J. Am. Chem. Soc.*, 2014, **136**, 1734-1737.
- 7 K. Pavithra and S. M. S. Kumar, *Catal. Sci. Technol.*, 2020, **10**, 1311-1322.
- 8 J. Yu, H. Liu, S. Song, Y. Wang and P. Tsiakaras, *Appl. Catal. A: Gen.*, 2017, **545**, 159-166.
- 9 Q. Lai, W. Yuan, W. Huang and G. Yuan, *Appl. Surf. Sci.*, 2020, **508**, 145221.
- 10 W. Luc, C. Collins, S. Wang, H. Xin, K. He, Y. Kang and F. Jiao, *J. Am. Chem. Soc.*, 2017, **139**, 1885-1893.
- 11 Y. Li, H. Yang, X. Hu, H. Tian, M. Gao, D. Zhang, Z. Li and D. Yang, *ChemElectroChem*, 2019, **6**, 3782-3790.
- 12 L. Yan, Z. Wu, C. Li and J. Wang, *J. Ind. Eng. Chem.*, 2023, **123**, 33-40.
- 13 F. Li, L. Chen, M. Xue, T. Williams, Y. Zhang, D. R. MacFarlane and J. Zhang, *Nano Energy*, 2017, **31**, 270-277.
- 14 S. Zhao, Y. Qin, T. Guo, S. Li, X. Liu, M. Ou, Y. Wu and Y. Chen, *ACS Appl. Nano Mater.*, 2021, **4**, 2257-2264.
- 15 Y. Liu, Z. Chen, Y. Yang, R. Zou, B. Deng, L. Zhong, K. P. Loh and X. Peng, *Appl. Catal. B Environ. Energy*, 2023, **331**, 122559.
- 16 N. Wei, S. Zhang, X. Yao, J. Yang, V. Nica and Q. Zhou, *Sci. China Mater.*, 2023, **66**, 4650-4662.
- 17 J. Zhang, Y. Hua, H. Li, X. Zhang, C. Shi, Y. Li, L. Di and Z. Wang, *Chem. Eng. J.*, 2023, **478**, 147288.
- 18 Y. Yang, R. Zou, J. Gan, Y. Wei, Z. Chen, X. Li, S. Admassie, Y. Liu and X. Peng, *Green Chem.*, 2023, **25**, 4104-4112.
- 19 J. E. Pander, J. W. J. Lum and B. S. Yeo, *J. Mater. Chem. A*, 2019, **7**, 4093-4101.
- 20 J. L. White, M. F. Baruch, J. E. Pander, Y. Hu, I. C. Fortmeyer, J. E. Park, T. Zhang, K. Liao, J. Gu, Y. Yan, T. W. Shaw, E. Abelev and A. B. Bocarsly, *Chem. Rev.*, 2015, **115**, 12888-12935.
- 21 S. Verma, S. Lu and P. J. A. Kenis, *Nat. Energy*, 2019, **4**, 466-474.
- 22 J. Wang, X. Li, M. Wang, T. Zhang, X. Chai, J. Lu, T. Wang, Y. Zhao and D. Ma, *ACS Catal.*, 2022, **12**, 6722-6728.
- 23 X. Wei, Y. Li, L. Chen and J. Shi, *Angewandte Chemie International Edition*, 2020, **60**, 3148-3155.
- 24 X. Guo, S.-M. Xu, H. Zhou, Y. Ren, R. Ge, M. Xu, L. Zheng, X. Kong, M. Shao, Z. Li and H. Duan, *ACS Catal.*, 2022, **12**, 10551-10559.
- 25 J. R. C. Junqueira, D. Das, A. Cathrin Brix, S. Dieckhöfer, J. Weidner, X. Wang, J. Shi and W. Schuhmann, *ChemSusChem*, 2023, **16**, 12697.
